# Supplementary material for: Lung epithelial tip progenitors integrate glucocorticoid- and STAT3-mediated signals to control progeny fate
Source: Oxford University Press journal article supplement (doi:10.1242/dev.134023), 2016-08-31
Supplement: dev134023supp.pdf [file dev134023supp.pdf]

## SUPPLEMENTAL FIGURES

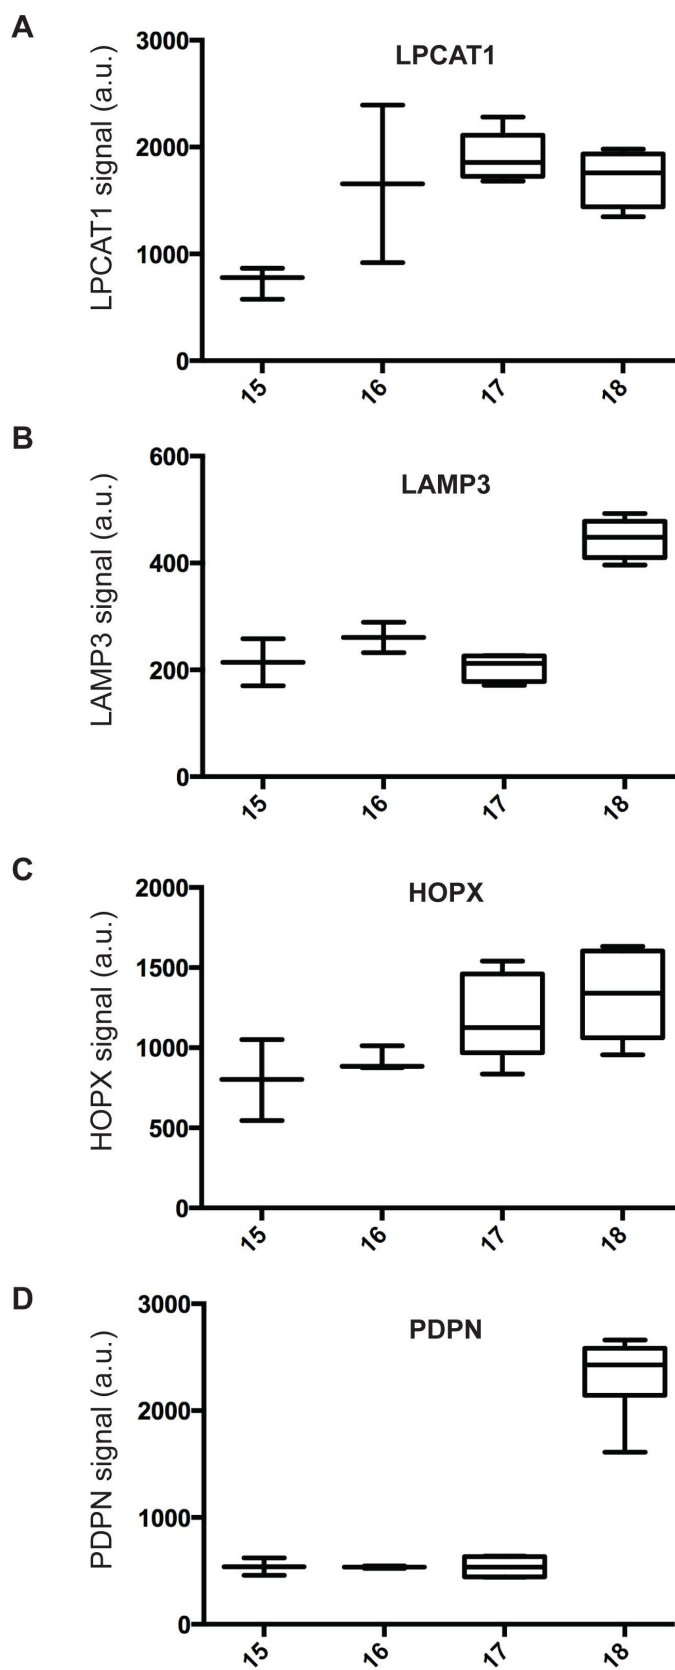

**Figure S1. Relative expression level of alveolar epithelial fate markers in normal lung development over time.** Bar and whisker plots showing relative expression levels of alveolar fate markers analysed in Figure 1 in arbitrary units normalized to the total cell area sampled. A. LPCAT1 (raw data from images underpinning Fig. 1D). B. LAMP3 (raw data from images underpinning Fig 1D). C. HOPX (raw data from images underpinning Fig. 1F). D. PDPN (raw data from images underpinning Fig. 1D).

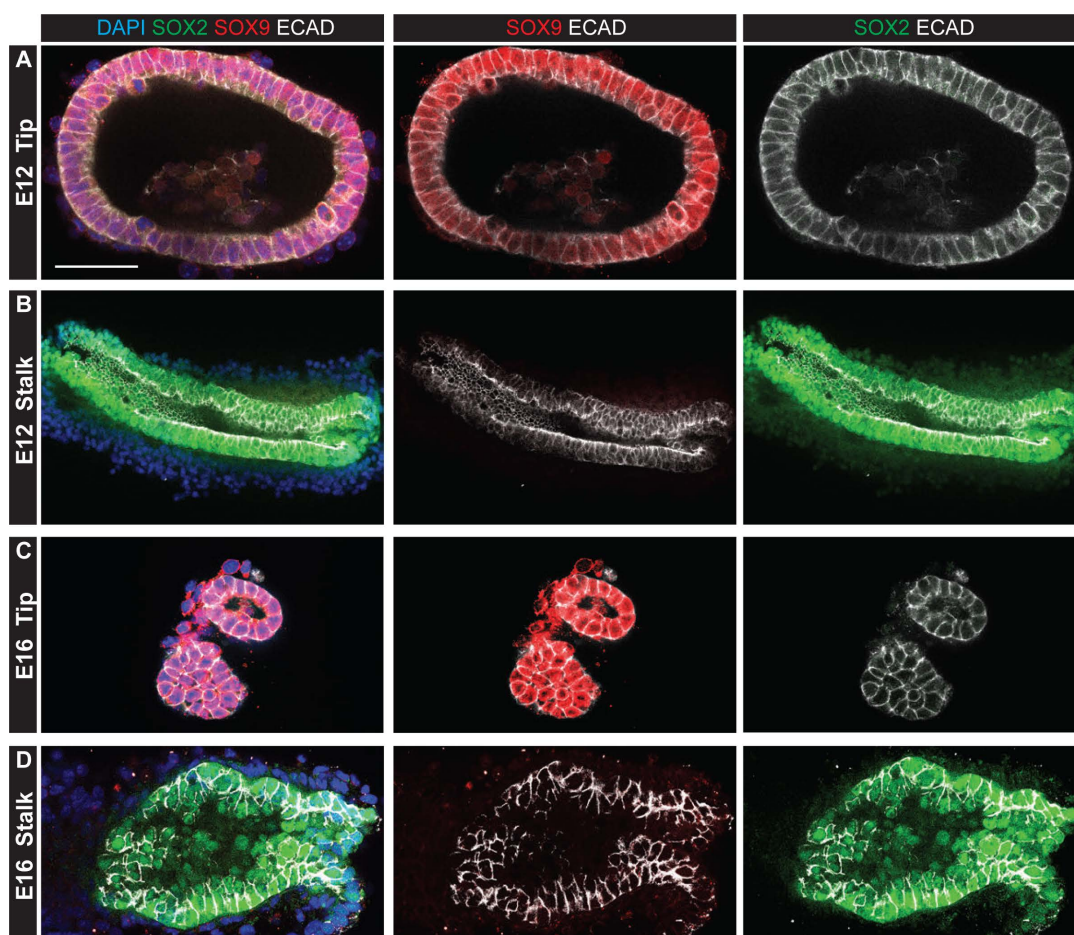

**Figure S2. Microdissected tip and stalk cells.** Examples of wholemount stained microdissected tip and stalk cells. Green: SOX2 (stalk/differentiating bronchioles); red: SOX9 (tip); white: E-CAD (epithelium); blue: DAPI (nuclei). A. E12.5 tip. B. E12.5 stalk. C. E16.5 tip. D. E16.5 stalk. Bars = 50  $\mu\text{m}$  A,C,D; 100  $\mu\text{m}$  B.

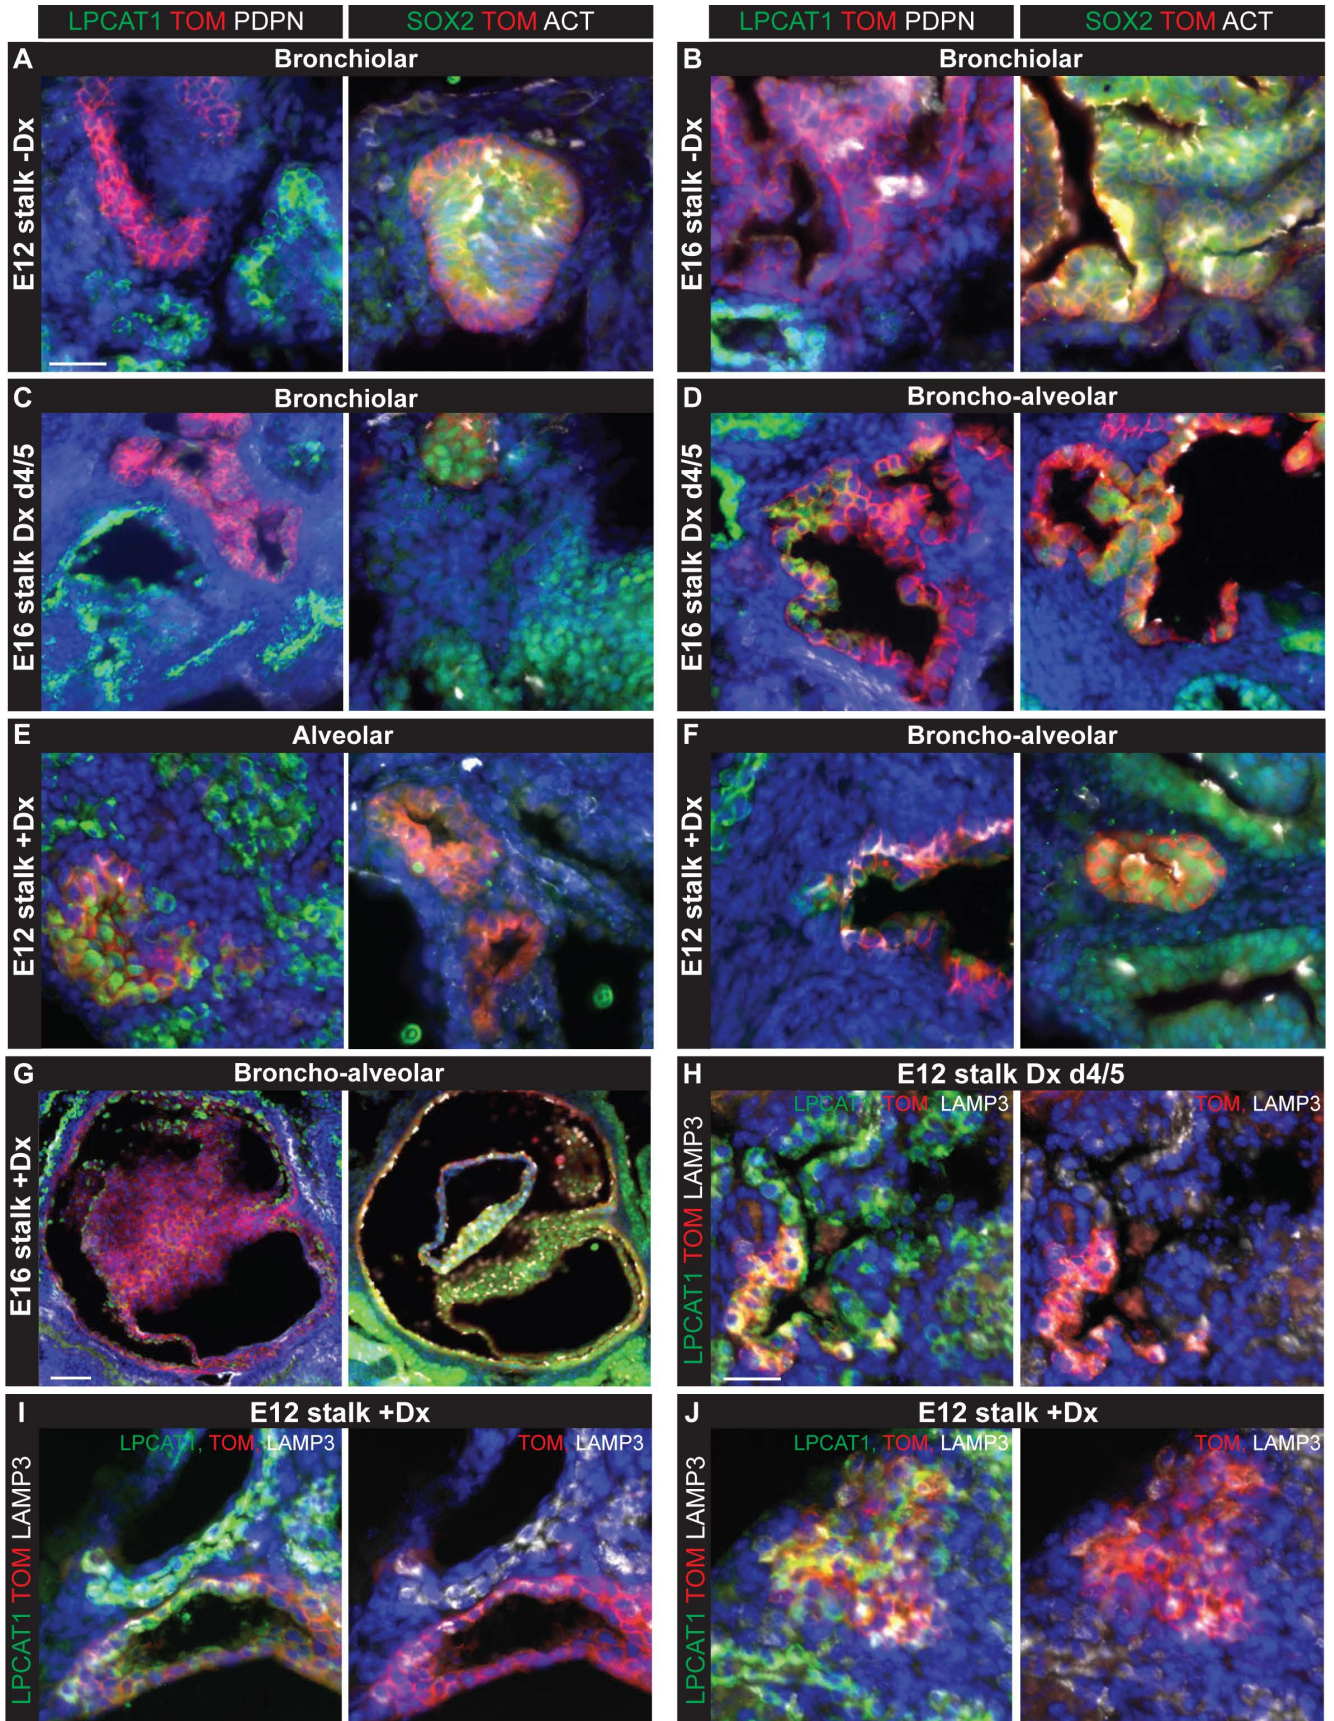

**Figure S3. Grafted stalk cells can respond to the host environment and alter progeny cell fate.** Examples of grafted stalk cells following 8 days of culture in various conditions. A-G. Two images of each graft are shown taken from adjacent slides stained to detect alveolar fate: green: LPCAT1 (alveolar fate); red: Tomato fluorescence (grafted cells); white: PDPN (basal and type 1 cells), or bronchiolar fate: green: SOX2 (bronchiolar fate); red: RFP (Tomato<sup>+</sup> graft); white: acetylated tubulin (cilia) to determine graft fate. A. E12.5 stalk, no Dx, bronchiolar-fated. B. E16.5 stalk, no Dx, bronchiolar-fated. C. E16.5 stalk, Dx day4/5, bronchiolar fated. D. E16.5 stalk, Dx day4/5, mixed broncho-alveolar fated. E. E12.5 stalk, Dx throughout, alveolar fated. F. E12.5 stalk, Dx throughout, mixed broncho-alveolar fated. G. E16.5 stalk, Dx throughout, mixed broncho-alveolar fated. H-J. Grafts are stained to detect alveolar markers. Green: LPCAT1 (alveolar fate); red: Tomato fluorescence (grafted cells); white: LAMP3 (differentiating AT2 cells). Right panel has the green channel removed to show the Tomato/LAMP3 co-localisation clearly. H. E12.5 stalk, Dx day4/5. I, J. E12.5 stalk, Dx throughout. Bars = 50  $\mu$ m C left panel; 100  $\mu$ m all other panels.

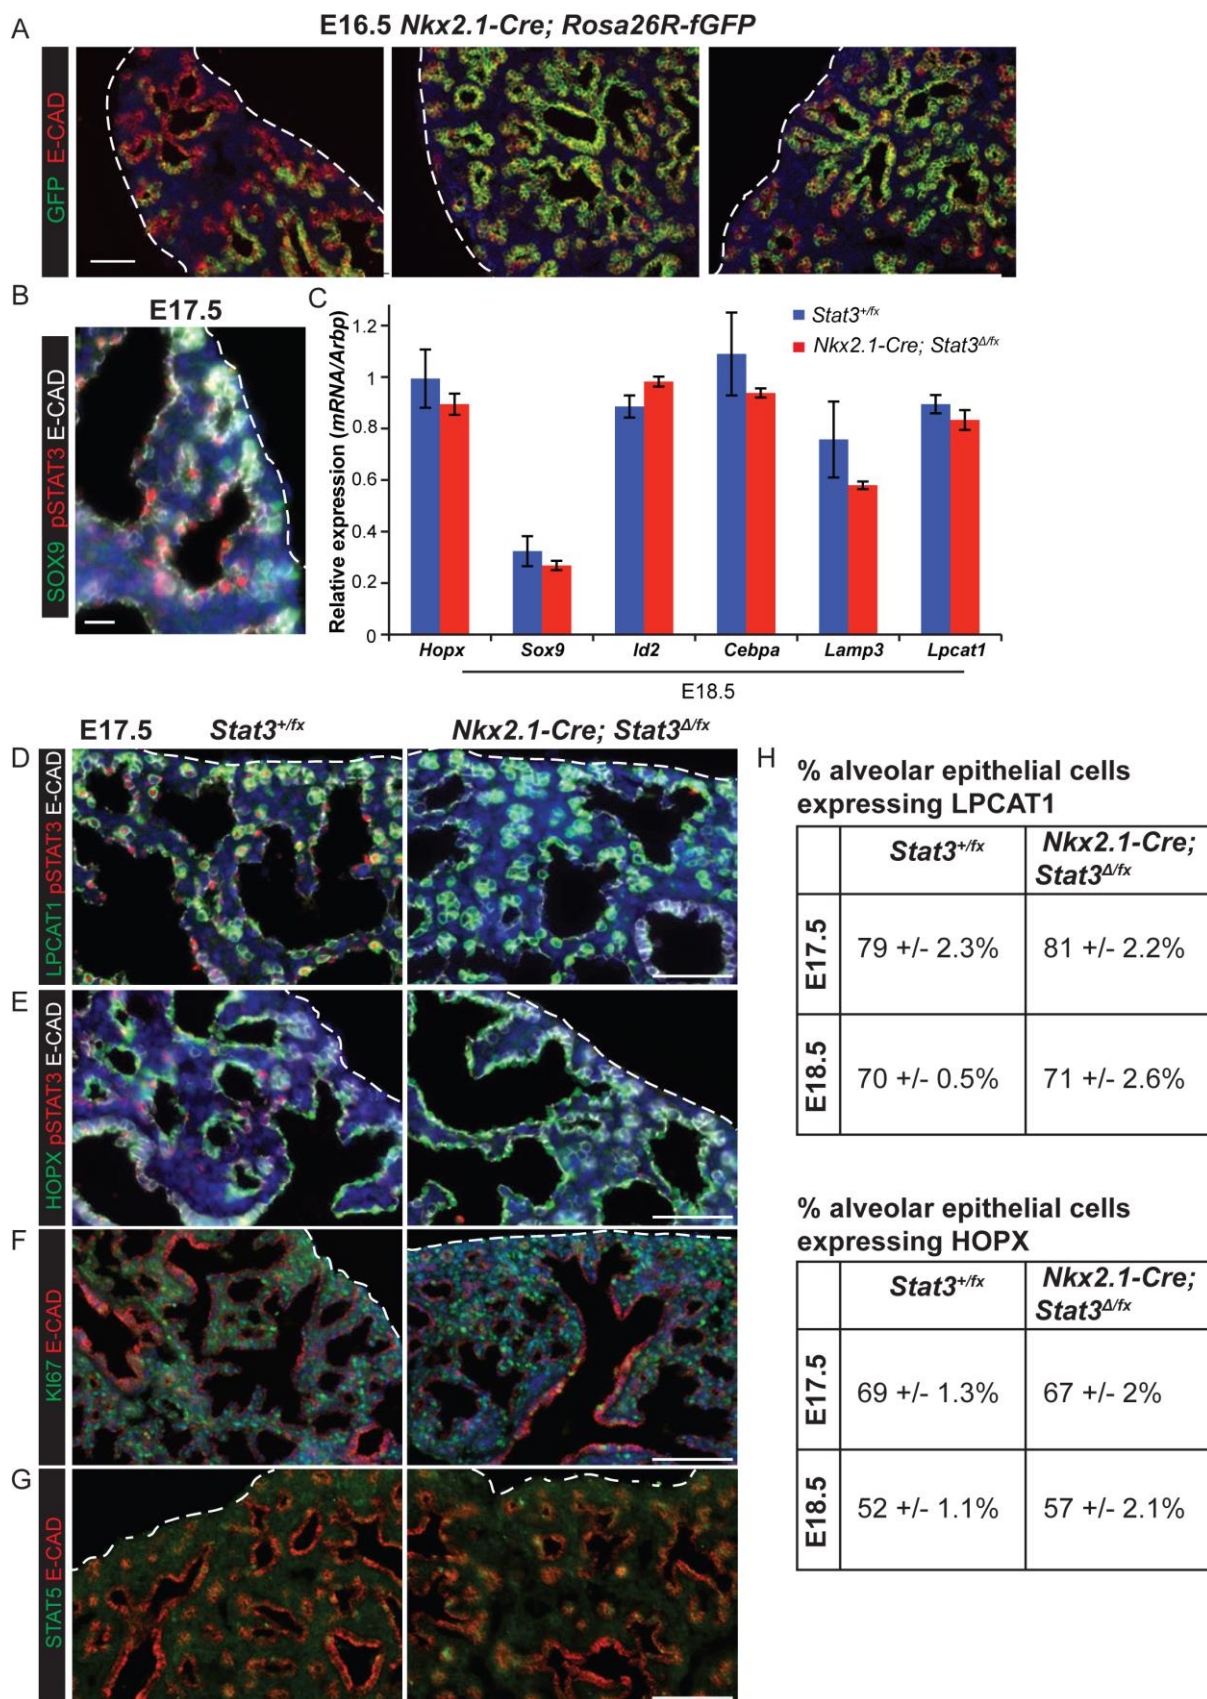

**Figure S4. Alveolar maturation ultimately occurs in the *Stat3* cKO lungs.** A. Sections of E16.5 *Nkx2.1-Cre; Rosa26R-fGFP* lungs illustrating variation in the extent of recombination. Green: eGFP (reporter); red: E-CAD (epithelium). B. Section of E17.5 wild-type lung illustrating that pSTAT3 is predominantly seen in differentiating cells that have exited the tip. Green: SOX9 (tip); red: pSTAT3; white: E-CAD (epithelium). C. RT-qPCR of progenitor and alveolar markers from *Nkx2.1-Cre; Stat3<sup>Δ/fx</sup>* and sibling *Stat3<sup>fx/+</sup>* control E18.5 lungs. Error bars = s.e.m. D, E. Sections of *Stat3* cKO and sibling lungs. D. Green: LPCAT1 (late tip and AT2 cells); red: pSTAT3; white: E-CAD (epithelium). E. Green: HOPX (differentiating AT1 cells); red: pSTAT3; white: E-CAD (epithelium). F: Green: Ki67 (proliferating cells); red: E-CAD (epithelium); blue: Dapi. G. Green: STAT5; red: E-CAD (epithelium). H. Quantification of LPCAT1 and HOPX staining in E17.5 and E18.5 *Nkx2.1-Cre; Stat3<sup>Δ/fx</sup>* and sibling *Stat3<sup>fx/+</sup>* control. Mean and s.e.m. are displayed for 3 independent samples. Bar = 50 μm A, D, E; 25 μm B; 100 μm F, G.

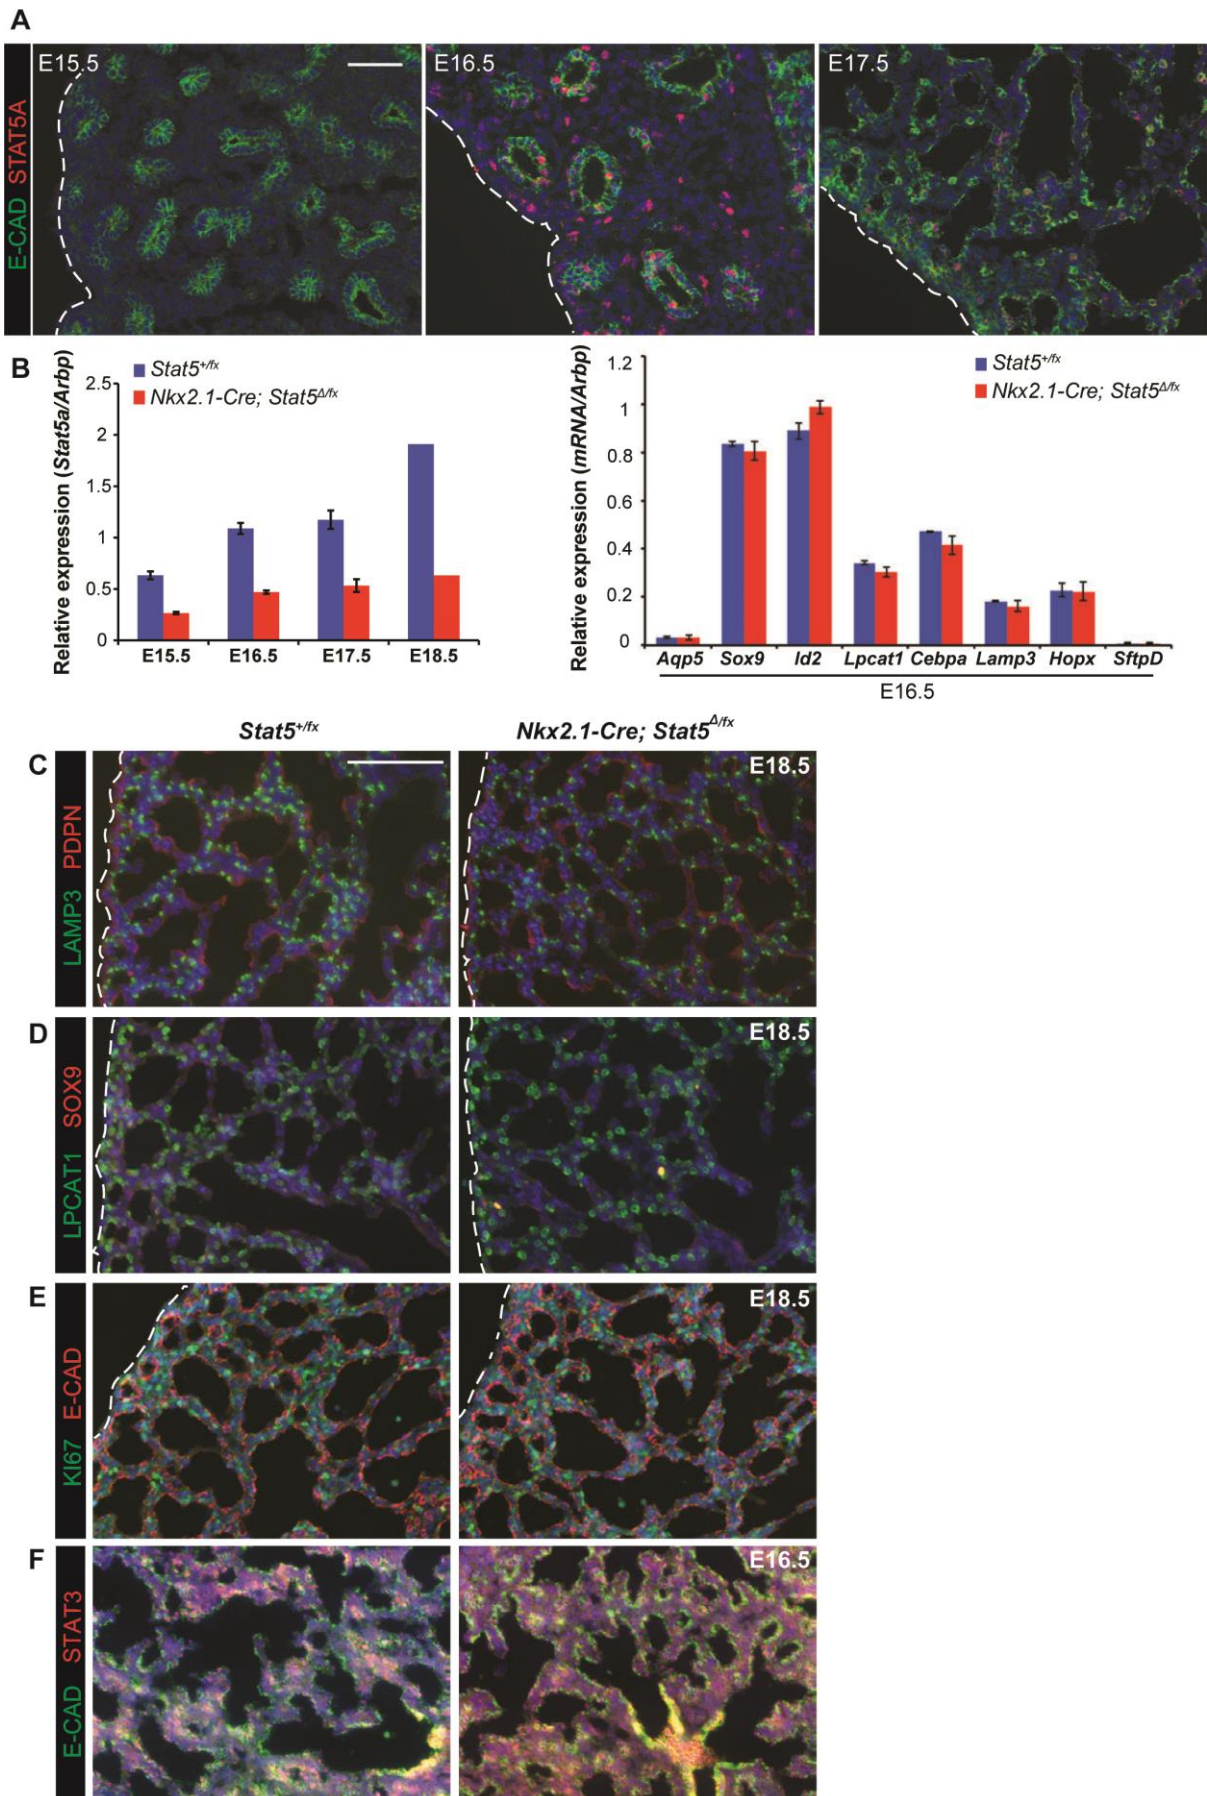



**Figure S5. Lung epithelial specific knock-out of *Stat5a/b* does not result in alveolar differentiation phenotypes.**

A. Wild-type E15.5, 16.5, 17.5 lung sections. Green: E-CAD (epithelium); Red: STAT5A. B. RT-qPCR of *Stat5a* and progenitor/alveolar markers from *Nkx2.1-Cre; Stat5<sup>Δfx</sup>* and sibling *Stat5<sup>fx/+</sup>* control lungs. Error bars = s.e.m. C-F. Sections of *Stat5* cKO and sibling control lungs. C. E18.5. Green: LAMP3 (differentiating AT2 cells); red: PDPN (AT1 cells). D. E18.5. Green: LPCAT1 (AT2 cells); red: SOX9 (progenitor cells). E. E18.5. Green: KI67 (proliferating cells); red: E-CAD (epithelium). F. E16.5. Green: E-CAD (epithelium); red: STAT3. At each time-point, three independent litters were collected and stained. Blue: Dapi. Bar = 50 μm A, E, F; 100 μm C,D.

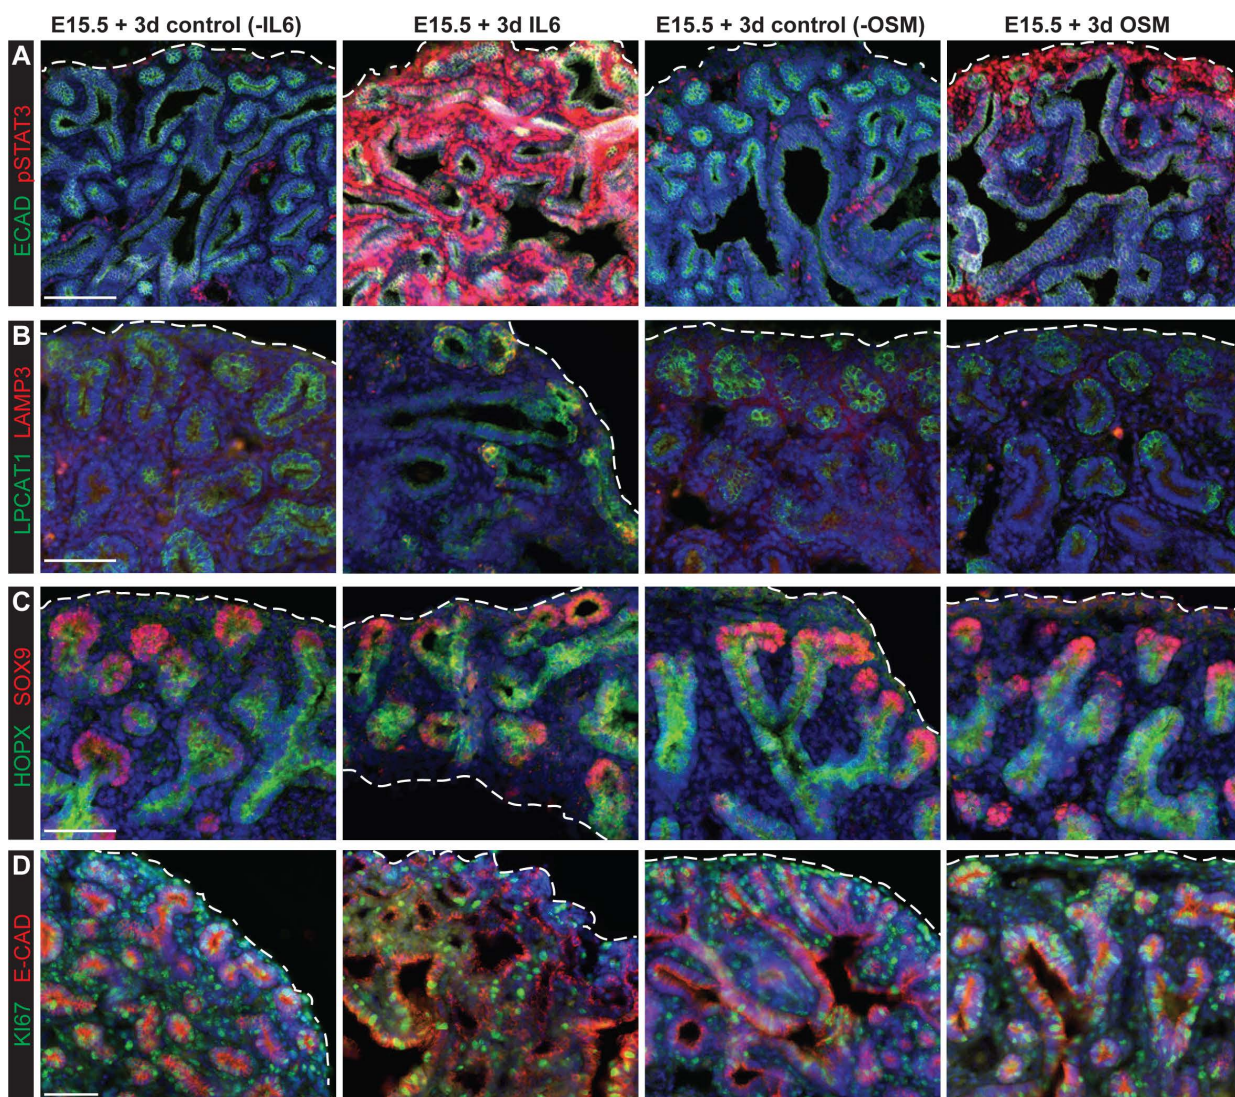

**Figure S6. Activating pSTAT3 via OSM is not sufficient to accelerate AT2 differentiation.** Sections of E15.5 lung slices cultured for 3 days +/- 10 ng/ml IL6, or +/- 25 ng/ml OSM. A. Green: E-CAD (epithelium); red (pSTAT3). B. Green: LPCAT1 (late tip and AT2); red: LAMP3 (AT2). C. Green: HOPX (stalk cells from E16.5, AT1 cells); red: SOX9. D. Green: KI67 (proliferating cells); red: E-CAD (epithelium); Blue: Dapi. Bar = 100  $\mu$ m A; 50  $\mu$ m B-D.

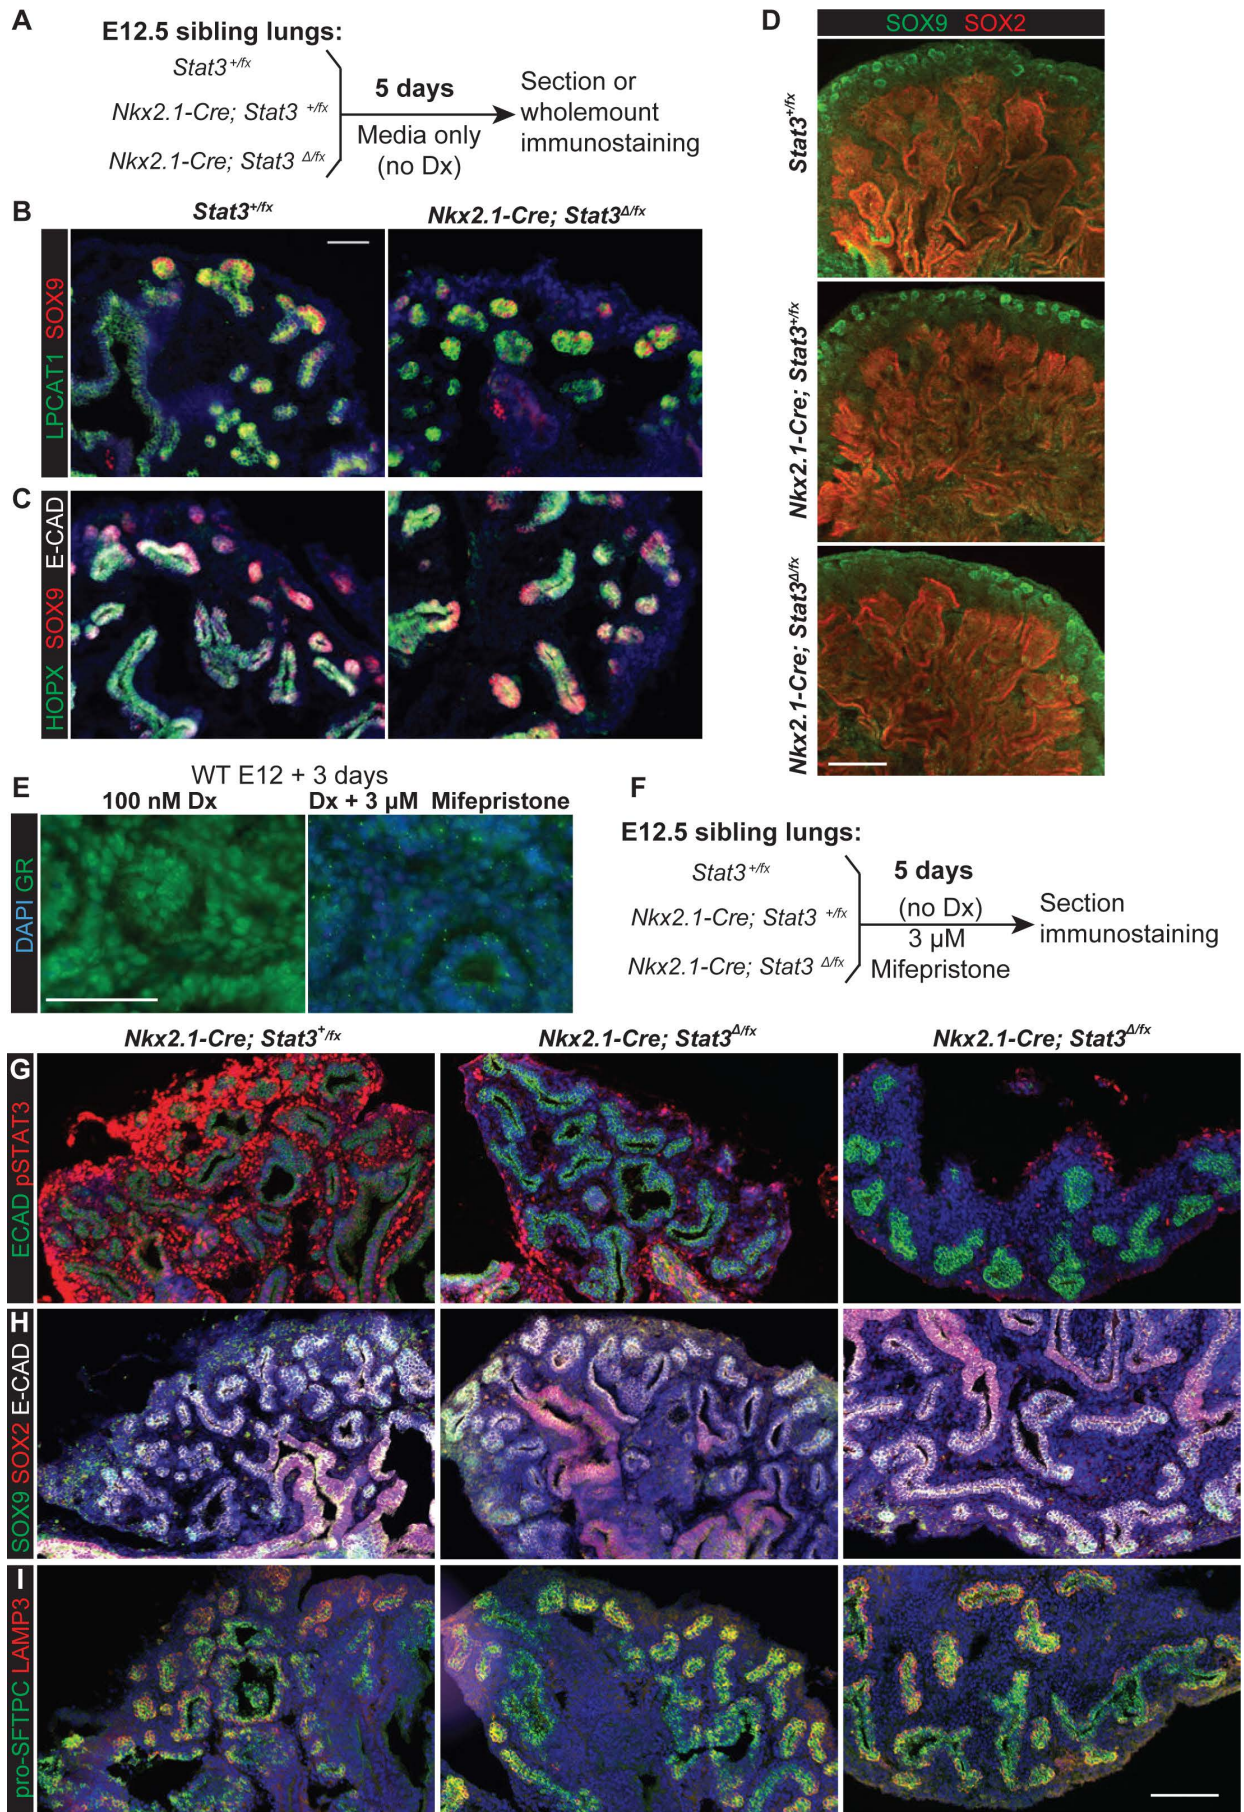

**Figure S7. No evidence for redundant Glucocorticoid and STAT3 activity in alveolar development.** A. Experimental scheme: E12.5 *Stat3* cKO and sibling control lungs were cultured for 5 days in the absence of exogenous glucocorticoid. B, C. E12.5 + 5 day sections (n=6 *Stat3* cKO lungs in two independent experiments). B. Green: LPCAT1; red: SOX9. C. Green: HOPX; red: SOX9; white: E-CAD. D. Confocal z-stack projections of E12.5 + 5 day wholemount immunostaining (n=3 *Stat3* cKO lungs). Green: SOX9; red: SOX2. Blue: Dapi. E. Sections of wild-type E12.5 lungs cultured for 3 days in 100nM Dx (left panel), or 100 nM Dx with 3  $\mu$ M Mifepristone (right panel). Green: GR. GR staining is reduced in the presence of Mifepristone. F. Sections of wild-type E12.5 lungs cultured for 5 days in the presence of 3  $\mu$ M Mifepristone, a Glucocorticoid inhibitor. G-I. Sections of *Stat3* cKO and sibling control lungs E12.5 + 5 days culture in Mifepristone. Two independent *Stat3* cKO lungs are shown (n=6 *Stat3* cKO lungs in two independent experiments). G. Green: E-CAD (epithelium); red: pSTAT3. H. Green: SOX9; red: SOX2; white: E-CAD. I. Green: pro-SFTPC; red: LAMP3. Bar = 50  $\mu$ m B, C, E; 250  $\mu$ m D; 100  $\mu$ m G-I.

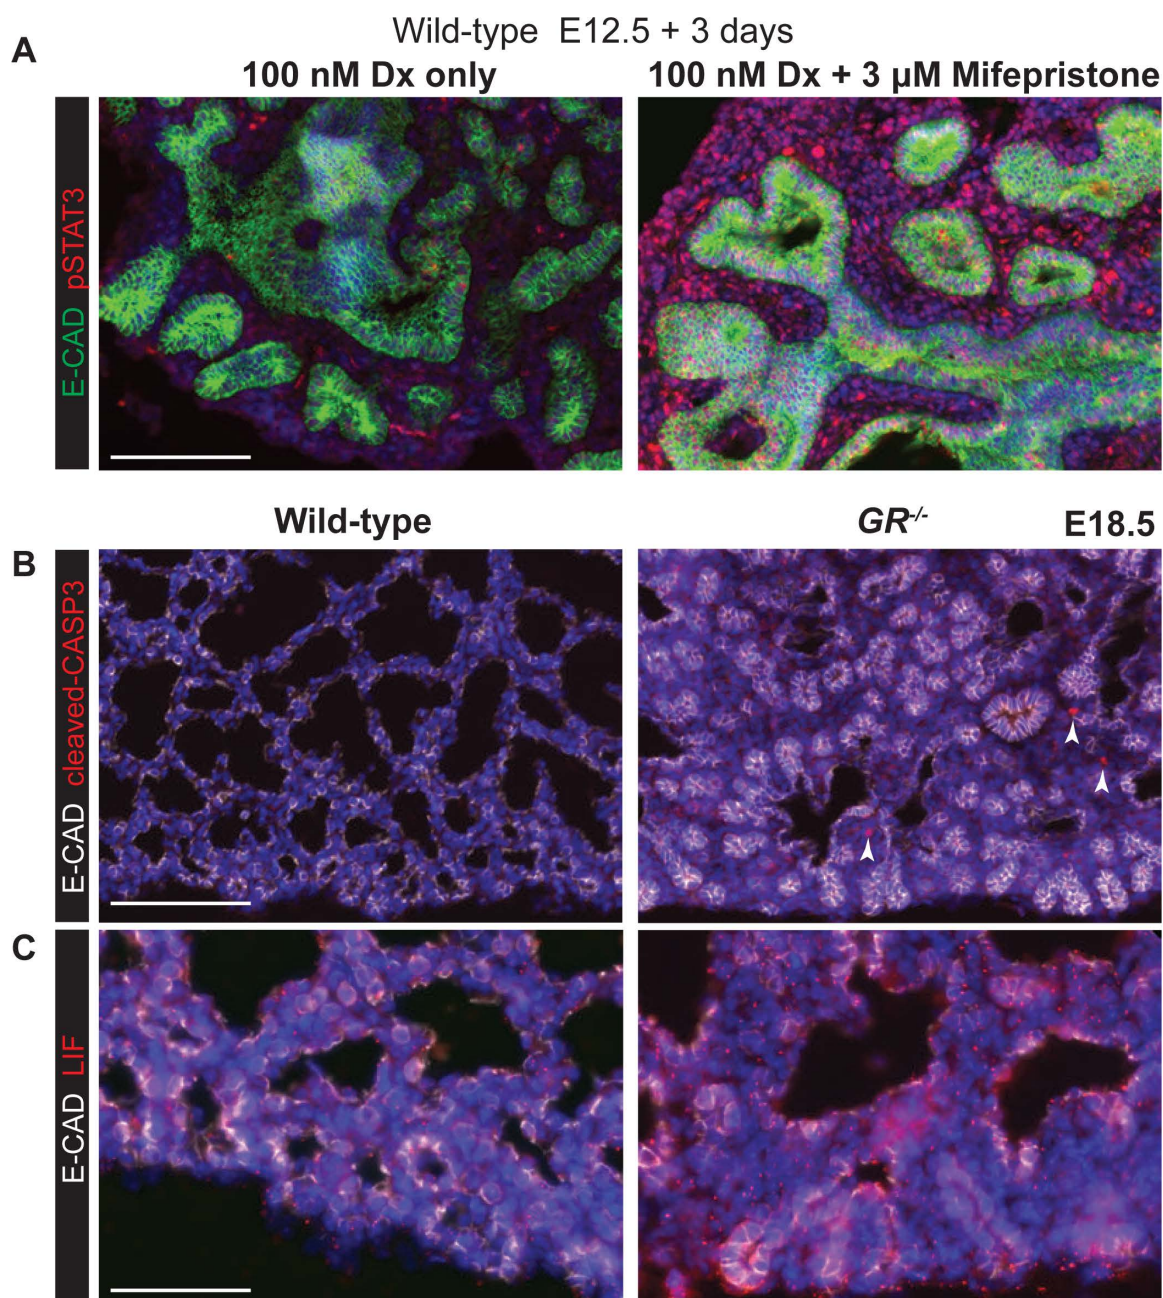

**Figure S8. STAT3 pathway activity in GR abrogated lungs.** A. Sections of wild-type E12.5 lungs cultured for 3 days in 100nM Dx (left panel), or 100 nM Dx with 3 μM Mifepristone (right panel). Green: E-CAD (epithelium); red: pSTAT3. B, C. Sections of *GR*<sup>-/-</sup> and sibling *GR*<sup>+/+</sup> control lungs. B. Red: cleaved-Caspase 3 (apoptotic cells); white: E-CAD (epithelium). Arrowheads mark a small number of apoptotic cells in the *GR*<sup>-/-</sup> lungs. C. Red: LIF; white: E-CAD (epithelium). Blue: Dapi. Bar = 100 μm A, B; 50 μm C.

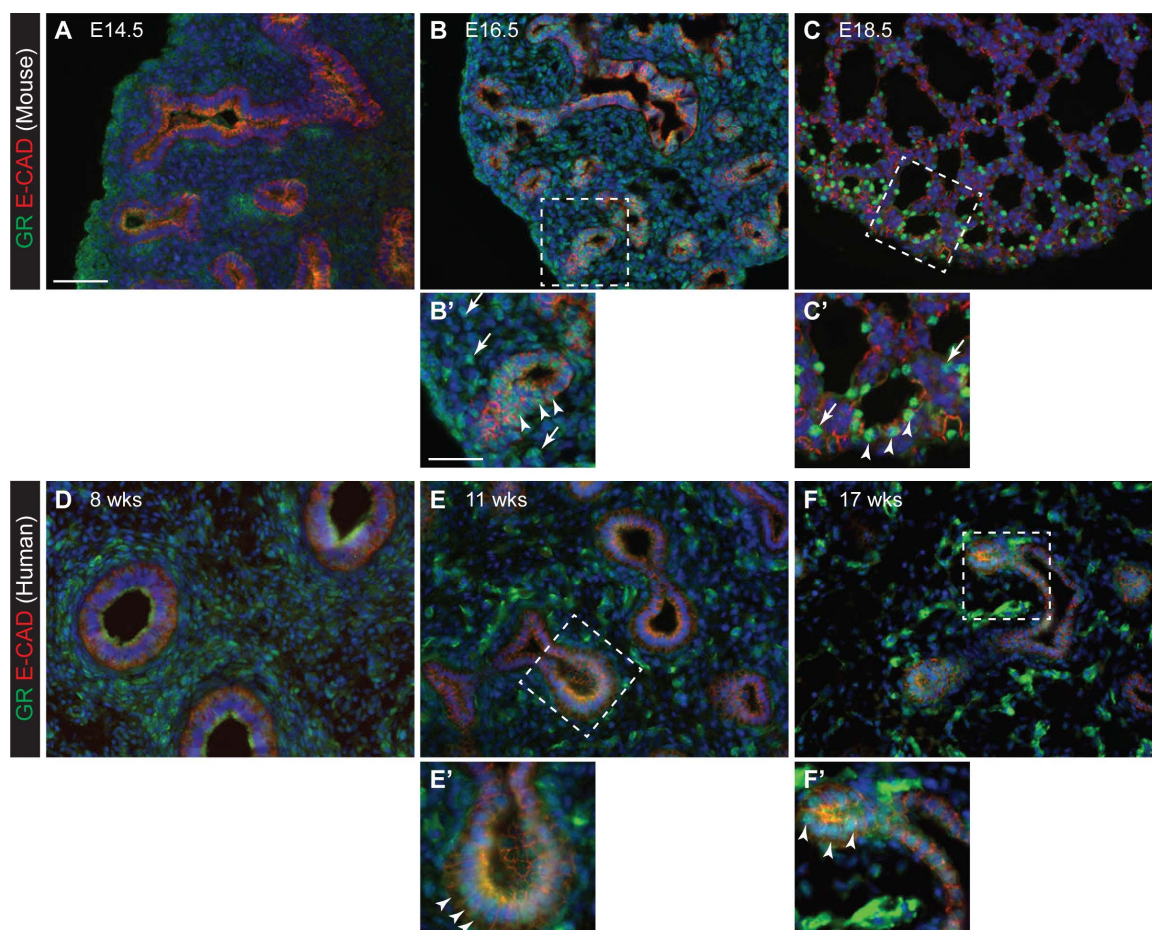

**Figure S9. GR staining in embryonic mouse and human lungs.** Sections of embryonic lungs stained for green: GR; red: E-CAD (epithelium); blue: Dapi. A-C. Mouse E14.5, 16.8 and 18.5. D-F. Human 8, 11 and 17 pcw. Boxed regions are blown up in B', C', E', F'. Arrow heads = GR<sup>+</sup> epithelial cells; arrows = GR<sup>+</sup> mesenchymal cells. Bar = 100  $\mu$ m; 50  $\mu$ m insets.

Table S1. Raw data accompanying Fig. 4.

| Virus           | Experiment number | Lung number | Total bronchiolar cells | GFP+ bronchiolar cells | Total alveolar cells | GFP+ alveolar cells | GFP+ bronchiolar cells / total bronchiolar cells (column E / column D) | GFP+ alveolar cells / total alveolar cells (column G / column F) | Ratio GFP+ alveolar : bronchiolar (column I / column J) | Mean ratio GFP+ alveolar : bronchiolar |                            |             | Total E-CAD+ cells (column D + column F) | GFP+ E-CAD cells (column E + column G) | % GFP+ E-CAD cells (column O / column P) *100 |
|-----------------|-------------------|-------------|-------------------------|------------------------|----------------------|---------------------|------------------------------------------------------------------------|------------------------------------------------------------------|---------------------------------------------------------|----------------------------------------|----------------------------|-------------|------------------------------------------|----------------------------------------|-----------------------------------------------|
|                 |                   |             |                         |                        |                      |                     |                                                                        |                                                                  |                                                         | Standard deviation                     | 2-tailed T test versus GFP |             |                                          |                                        |                                               |
| <b>GFP</b>      | ALC8              | 1           | 323                     | 34                     | 901                  | 89                  | 0.105263158                                                            | 0.098779134                                                      | 0.938401776                                             |                                        |                            |             | 1224                                     | 123                                    | 10.04901961                                   |
|                 | ALC8              | 2           | 161                     | 14                     | 665                  | 81                  | 0.086956522                                                            | 0.121804511                                                      | 1.40075188                                              |                                        |                            |             | 826                                      | 95                                     | 11.50121065                                   |
|                 | ALC10             | 3           | 478                     | 29                     | 953                  | 79                  | 0.060669456                                                            | 0.082896118                                                      | 1.366356696                                             |                                        |                            |             | 1431                                     | 108                                    | 7.547169811                                   |
|                 | ALC15             | 4           | 373                     | 108                    | 542                  | 144                 | 0.289544236                                                            | 0.265682657                                                      | 0.917589176                                             |                                        |                            |             | 915                                      | 252                                    | 27.54098361                                   |
|                 | ALC15             | 5           | 189                     | 31                     | 783                  | 131                 | 0.164021164                                                            | 0.167305236                                                      | 1.02002247                                              |                                        |                            |             | 972                                      | 162                                    | 16.66666667                                   |
|                 | ALC15             | 6           | 258                     | 62                     | 595                  | 118                 | 0.240310078                                                            | 0.198319328                                                      | 0.825264299                                             | 1.078064346                            | 0.244857                   |             | 853                                      | 180                                    | 21.10199297                                   |
| <b>NOTCH</b>    | ALC8              | 1           | 240                     | 14                     | 594                  | 40                  | 0.058333333                                                            | 0.067340067                                                      | 1.154401154                                             |                                        |                            |             | 834                                      | 54                                     | 6.474820144                                   |
|                 | ALC10             | 2           | 482                     | 24                     | 404                  | 22                  | 0.049792531                                                            | 0.054455446                                                      | 1.093646865                                             |                                        |                            |             | 886                                      | 46                                     | 5.191873589                                   |
|                 | ALC16             | 3           | 192                     | 21                     | 582                  | 174                 | 0.109375                                                               | 0.298969072                                                      | 2.733431517                                             |                                        |                            |             | 774                                      | 195                                    | 25.19379845                                   |
|                 | ALC16             | 4           | 274                     | 44                     | 239                  | 76                  | 0.160583942                                                            | 0.317991632                                                      | 1.980220616                                             |                                        |                            |             | 513                                      | 120                                    | 23.39181287                                   |
|                 | ALC16             | 5           | 377                     | 64                     | 578                  | 74                  | 0.169761273                                                            | 0.128027682                                                      | 0.754163062                                             |                                        |                            |             | 955                                      | 138                                    | 14.45026178                                   |
|                 | ALC16             | 6           | 279                     | 38                     | 1121                 | 169                 | 0.136200717                                                            | 0.150758252                                                      | 1.106882952                                             |                                        |                            |             | 1400                                     | 207                                    | 14.78571429                                   |
|                 | ALC16             | 7           | 596                     | 88                     | 301                  | 34                  | 0.147651007                                                            | 0.112956811                                                      | 0.765025672                                             | 1.369681691                            | 0.72671                    | 0.370618892 | 897                                      | 122                                    | 13.60089186                                   |
|                 | ALC16             | 8           | 398                     | 58                     | 441                  | 87                  | 0.145728643                                                            | 0.197278912                                                      | 1.353741497                                             | 1.273700888                            | 0.293666                   | 0.211391815 | 839                                      | 145                                    | 17.28247914                                   |
| <b>CEBPA</b>    | ALC19             | 1           | 133                     | 35                     | 587                  | 97                  | 0.263157895                                                            | 0.165247019                                                      | 0.627938671                                             |                                        |                            |             | 720                                      | 132                                    | 18.33333333                                   |
|                 | ALC19             | 2           | 211                     | 83                     | 333                  | 167                 | 0.393364929                                                            | 0.501501502                                                      | 1.274901407                                             |                                        |                            |             | 544                                      | 250                                    | 45.95588235                                   |
|                 | ALC19             | 3           | 231                     | 52                     | 713                  | 187                 | 0.225108225                                                            | 0.26227209                                                       | 1.165093322                                             |                                        |                            |             | 494                                      | 239                                    | 25.31779661                                   |
|                 | ALC19             | 4           | 368                     | 105                    | 524                  | 227                 | 0.285326087                                                            | 0.433206107                                                      | 1.51828426                                              |                                        |                            |             | 892                                      | 332                                    | 37.21973094                                   |
|                 | ALC21             | 5           | 305                     | 46                     | 373                  | 84                  | 0.150819672                                                            | 0.225201072                                                      | 1.493181023                                             |                                        |                            |             | 678                                      | 130                                    | 19.1740413                                    |
|                 | ALC21             | 6           | 299                     | 40                     | 380                  | 63                  | 0.133779264                                                            | 0.165789474                                                      | 1.239276316                                             |                                        |                            |             | 679                                      | 103                                    | 15.16936672                                   |
|                 | ALC21             | 7           | 322                     | 47                     | 289                  | 64                  | 0.145962733                                                            | 0.221453287                                                      | 1.517190606                                             |                                        |                            |             | 611                                      | 111                                    | 18.16693944                                   |
|                 | ALC21             | 8           | 398                     | 58                     | 441                  | 87                  | 0.145728643                                                            | 0.197278912                                                      | 1.353741497                                             | 1.273700888                            | 0.293666                   | 0.211391815 | 839                                      | 145                                    | 17.28247914                                   |
| <b>CITED2</b>   | ALC8              | 1           | 176                     | 4                      | 304                  | 12                  | 0.022727273                                                            | 0.039473684                                                      | 1.736842105                                             |                                        |                            |             | 480                                      | 16                                     | 3.333333333                                   |
|                 | ALC8              | 2           | 465                     | 18                     | 970                  | 105                 | 0.038709677                                                            | 0.108247423                                                      | 2.796391753                                             |                                        |                            |             | 1435                                     | 123                                    | 8.571428571                                   |
|                 | ALC17             | 3           | 58                      | 5                      | 1007                 | 156                 | 0.086206897                                                            | 0.154915591                                                      | 1.797020854                                             |                                        |                            |             | 1065                                     | 161                                    | 15.11737089                                   |
|                 | ALC17             | 4           | 685                     | 50                     | 553                  | 97                  | 0.072992701                                                            | 0.175406872                                                      | 2.403074141                                             |                                        |                            |             | 1238                                     | 147                                    | 11.87399031                                   |
|                 | ALC17             | 5           | 191                     | 46                     | 560                  | 206                 | 0.240837696                                                            | 0.367857143                                                      | 1.527406832                                             | 2.052147137                            | 0.52842                    | 0.002865192 | 751                                      | 252                                    | 33.55525965                                   |
| <b>STAT3.1</b>  | ALC14             | 1           | 390                     | 72                     | 1220                 | 403                 | 0.184615385                                                            | 0.330327869                                                      | 1.789275956                                             |                                        |                            |             | 1610                                     | 475                                    | 29.50310559                                   |
|                 | ALC14             | 2           | 452                     | 89                     | 628                  | 94                  | 0.196902655                                                            | 0.149681529                                                      | 0.760180348                                             |                                        |                            |             | 1080                                     | 183                                    | 16.94444444                                   |
|                 | ALC20             | 3           | 283                     | 25                     | 477                  | 118                 | 0.088339223                                                            | 0.247379455                                                      | 2.80033543                                              |                                        |                            |             | 760                                      | 143                                    | 18.81578947                                   |
|                 | ALC20             | 4           | 148                     | 14                     | 254                  | 86                  | 0.094594595                                                            | 0.338582677                                                      | 3.579302587                                             |                                        |                            |             | 402                                      | 100                                    | 24.87562189                                   |
|                 | ALC20             | 5           | 85                      | 15                     | 396                  | 107                 | 0.176470588                                                            | 0.27020202                                                       | 1.531144781                                             |                                        |                            |             | 481                                      | 122                                    | 25.36382536                                   |
|                 | ALC20             | 6           | 61                      | 11                     | 322                  | 110                 | 0.180327869                                                            | 0.341614907                                                      | 1.894409938                                             |                                        |                            |             | 383                                      | 121                                    | 31.5926893                                    |
|                 | ALC22             | 7           | 283                     | 25                     | 477                  | 118                 | 0.088339223                                                            | 0.247379455                                                      | 2.80033543                                              |                                        |                            |             | 760                                      | 143                                    | 18.81578947                                   |
|                 | ALC22             | 8           | 148                     | 14                     | 254                  | 86                  | 0.094594595                                                            | 0.338582677                                                      | 3.579302587                                             | 2.341785882                            | 1.010478                   | 0.01169454  | 402                                      | 100                                    | 24.87562189                                   |
| <b>STAT3.2</b>  | ALC20             | 1           | 219                     | 26                     | 466                  | 107                 | 0.118721461                                                            | 0.229613734                                                      | 1.934054143                                             |                                        |                            |             | 685                                      | 133                                    | 19.41605839                                   |
|                 | ALC20             | 2           | 259                     | 15                     | 292                  | 44                  | 0.057915058                                                            | 0.150684932                                                      | 2.601826484                                             |                                        |                            |             | 551                                      | 59                                     | 10.70780399                                   |
|                 | ALC22             | 3           | 318                     | 24                     | 475                  | 86                  | 0.075471698                                                            | 0.181052632                                                      | 2.398947368                                             |                                        |                            |             | 793                                      | 110                                    | 13.87137453                                   |
|                 | ALC22             | 4           | 812                     | 54                     | 335                  | 45                  | 0.066502463                                                            | 0.134328358                                                      | 2.019000498                                             |                                        |                            |             | 1147                                     | 99                                     | 8.631211857                                   |
|                 | ALC22             | 5           | 420                     | 36                     | 474                  | 82                  | 0.085714286                                                            | 0.172995781                                                      | 2.018284107                                             | 2.19460252                             | 0.290294                   | 0.000142186 | 894                                      | 118                                    | 13.19910515                                   |
| <b>STAT5A.1</b> | ALC12             | 1           | 409                     | 7                      | 739                  | 43                  | 0.017114914                                                            | 0.058186739                                                      | 3.399768026                                             |                                        |                            |             | 1148                                     | 50                                     | 4.355400697                                   |
|                 | ALC12             | 2           | 100                     | 1                      | 539                  | 19                  | 0.035250464                                                            | 0.035250464                                                      | 3.525046382                                             |                                        |                            |             | 639                                      | 20                                     | 3.129890454                                   |
|                 | ALC12             | 3           | 302                     | 9                      | 971                  | 43                  | 0.029801325                                                            | 0.044284243                                                      | 1.485982378                                             |                                        |                            |             | 1273                                     | 52                                     | 4.084838963                                   |
|                 | ALC17             | 4           | 664                     | 88                     | 912                  | 270                 | 0.13253012                                                             | 0.296052632                                                      | 2.233851675                                             |                                        |                            |             | 1576                                     | 358                                    | 22.71573604                                   |
|                 | ALC17             | 5           | 367                     | 53                     | 1034                 | 244                 | 0.144414169                                                            | 0.235976789                                                      | 1.634027955                                             |                                        |                            |             | 1401                                     | 297                                    | 21.19914347                                   |
|                 | ALC17             | 6           | 190                     | 12                     | 557                  | 76                  | 0.063157895                                                            | 0.136445242                                                      | 2.160383004                                             | 2.406509903                            | 0.868582                   | 0.004801348 | 747                                      | 88                                     | 11.78045515                                   |
| <b>STAT5A.2</b> | ALC12             | 1           | 570                     | 23                     | 808                  | 71                  | 0.040350877                                                            | 0.087871287                                                      | 2.177679724                                             |                                        |                            |             | 1378                                     | 94                                     | 6.821480406                                   |
|                 | ALC12             | 2           | 388                     | 15                     | 489                  | 64                  | 0.038659794                                                            | 0.130879346                                                      | 3.385412406                                             |                                        |                            |             | 877                                      | 79                                     | 9.007981756                                   |
|                 | ALC18             | 3           | 615                     | 89                     | 942                  | 261                 | 0.144715447                                                            | 0.277070064                                                      | 1.914585272                                             |                                        |                            |             | 1557                                     | 350                                    | 22.47912653                                   |
|                 | ALC18             | 4           | 617                     | 98                     | 561                  | 223                 | 0.158833063                                                            | 0.397504456                                                      | 2.502655608                                             | 2.495083253                            | 0.640434                   | 0.001027725 | 1178                                     | 321                                    | 27.24957555                                   |
| <b>STAT6</b>    | ALC19             | 1           | 97                      | 12                     | 476                  | 105                 | 0.12371134                                                             | 0.220588235                                                      | 1.783088235                                             |                                        |                            |             | 573                                      | 117                                    | 20.41884817                                   |
|                 | ALC19             | 2           | 182                     | 47                     | 345                  | 103                 | 0.258241758                                                            | 0.298550725                                                      | 1.15609004                                              |                                        |                            |             | 527                                      | 150                                    | 28.4629981                                    |
|                 | ALC19             | 3           | 452                     | 56                     | 542                  | 115                 | 0.123893805                                                            | 0.212177122                                                      | 1.712572483                                             |                                        |                            |             | 994                                      | 171                                    | 17.20321932                                   |
|                 | ALC19             | 4           | 313                     | 20                     | 416                  | 64                  | 0.063897764                                                            | 0.153846154                                                      | 2.407692308                                             | 1.764860766                            | 0.512152                   | 0.020296067 | 729                                      | 84                                     | 11.52263374                                   |

**Table S2. Secondary antibodies**

| <b>Species and fluorophore</b> | <b>Catalogue code</b> |
|--------------------------------|-----------------------|
| Donkey anti-mouse 488          | A21202                |
| Goat anti-chick 488            | A11039                |
| Donkey anti-goat 488           | A11055                |
| Donkey anti-rabbit 488         | A21206                |
| Donkey anti-mouse 546          | A10036                |
| Donkey anti-rabbit 546         | A10040                |
| Donkey anti-goat 555           | A21432                |
| Goat anti-hamster 568          | A21112                |
| Donkey anti-rat 594            | A21209                |
| Donkey anti-mouse 647          | A31571                |
| Donkey anti-rabbit 647         | A31573                |
| Goat anti hamster 647          | A21451                |
| Goat anti-rat 647              | A21247                |

### **Supplementary Materials and Methods**

#### **Measurement of protein expression levels**

A custom macro (below) for ImageJ was used for quantification of protein expression. To install the plugin, put the file in the `Fiji.app/Plugins/` folder and restart Fiji or run `Help/Refresh` menus. To access the relevant part of the filesystem under MacOS, Ctrl-click on the Fiji application icon to open the contextual menu and click `Show Package Contents`.

[Click here to Download macro file](#)
